# Supplementary material for: In situ oxidized TiO2/MXene ultrafiltration membrane with photocatalytic self-cleaning and antibacterial properties
Source: Royal Society of Chemistry journal article supplement (doi:10.1039/d3ra02230g), 2023-01-01
Supplement: d3ra02230g1.pdf [file d3ra02230g1.pdf]

## Supporting Information

### **In-situ oxidized MXene ultrafiltration membrane with photocatalytic self-cleaning and antibacterial properties**

Shunkai Xu<sup>a,b,1</sup>, Changrong Zhao<sup>a,1</sup>, Guangchao Li<sup>a\*</sup>, Zhou Shi, Bin Liu<sup>a\*</sup>

<sup>a</sup> *Hunan Engineering Research Center of Water Security Technology and Application, College of Civil*

*Engineering, Hunan University, Changsha 410082, PR China*

<sup>b</sup> *Beijing General Municipal Engineering Design & Research Institute Co.,Ltd*

*., Beijing 100081, China*

<sup>1</sup> These authors contributed equally to this work

\*Corresponding author.

E-mail address: [lgc\\_hnu@hnu.edu.cn](mailto:lgc_hnu@hnu.edu.cn) (Guangchao Li); [ahxclb@163.com](mailto:ahxclb@163.com) (Bin Liu)

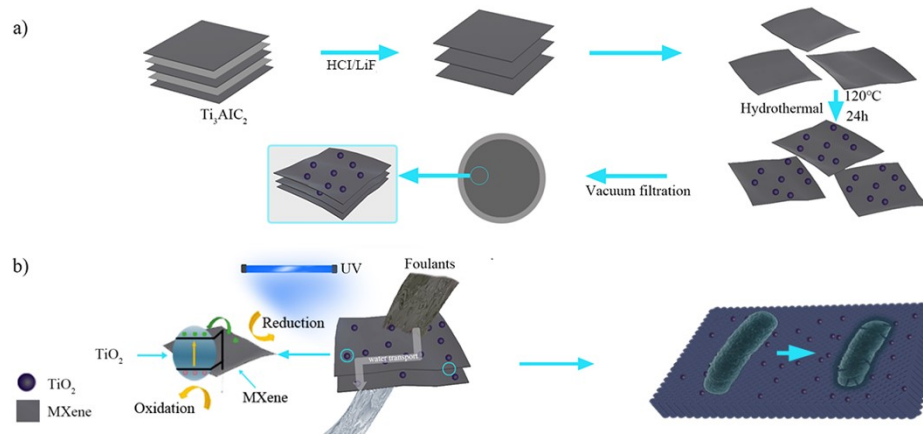

**Figure S1.** (a)Preparation of  $\text{TiO}_2/\text{MXene}$ ; (b)antibacterial mechanism of  $\text{TiO}_2/\text{MXene}$  membrane

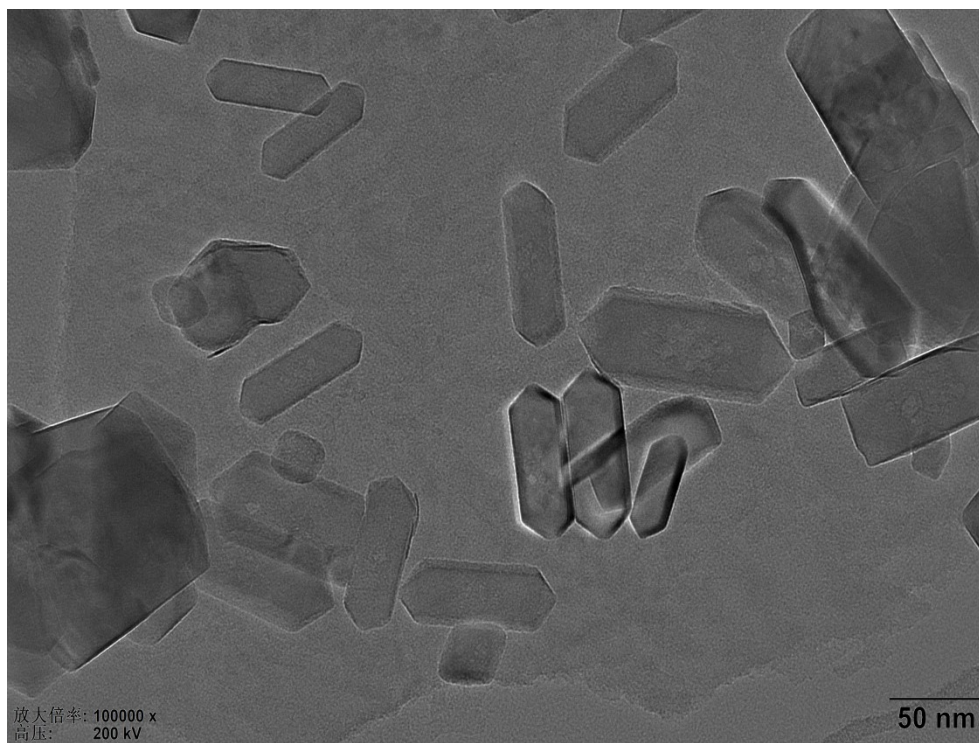

**Figure S2.** Tem of  $\text{TiO}_2/\text{MXene}$  layer

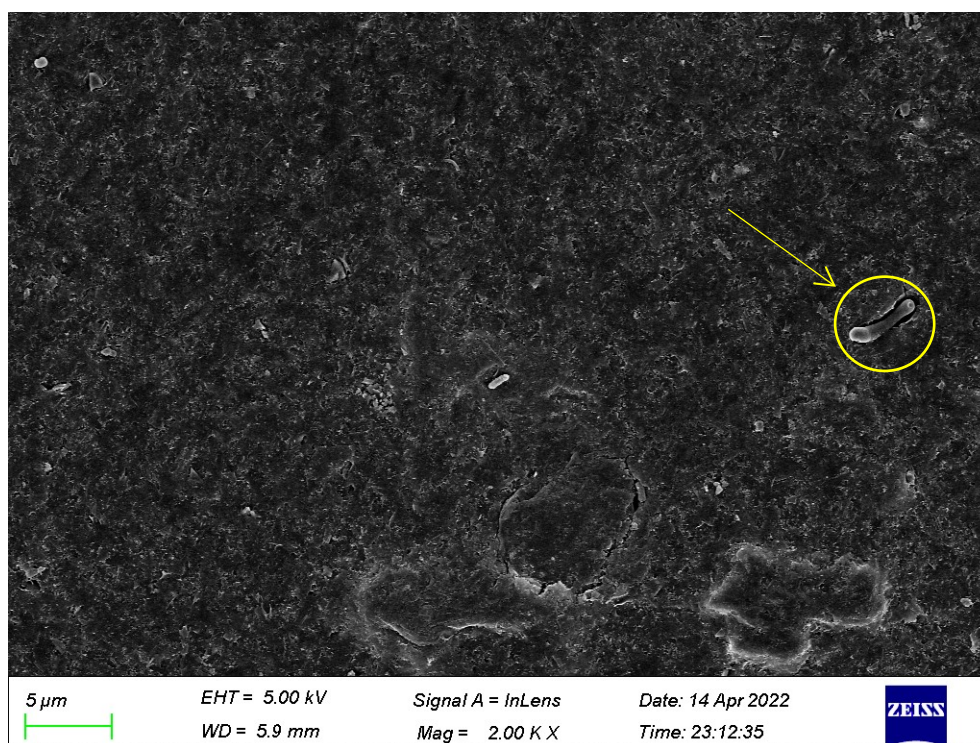

**Figure S3.** Surface SEM of TM-0.24 membrane

**Table S1.** Physicochemical parameters of membrane and adsorption free energy at h0

| Membrane                     | Contact angle (°) |          |               | Surface tensions |            |            | Interaction energy (mJ·m <sup>-2</sup> ) |                 |                  |
|------------------------------|-------------------|----------|---------------|------------------|------------|------------|------------------------------------------|-----------------|------------------|
|                              | Water             | Glycerol | Diiodomethane | $\gamma^{lw}$    | $\gamma^+$ | $\gamma^-$ | $\Delta G^{LW}$                          | $\Delta G^{AB}$ | $\Delta G^{TOT}$ |
| MXene (1mg)                  | 80.4±0.3          | 64.6±0.6 | 20.5±0.6      | 47.63            | 0.07       | 3.12       | -10.39                                   | -62.17          | -72.56           |
| MXene (2mg)                  | 80.0±0.2          | 70.0±0.5 | 49.6±0.7      | 34.50            | 0.23       | 6.48       | -5.61                                    | -53.78          | -59.39           |
| MXene (3mg)                  | 76.2±0.2          | 70.0±0.7 | 55±1.0        | 31.45            | 0.25       | 10.63      | -4.37                                    | -47.38          | -51.75           |
| MXene (4mg)                  | 71.5±0.3          | 68.2±0.9 | 71.5±0.3      | 29.44            | 0.37       | 14.99      | -3.52                                    | -41.27          | -44.79           |
| TiO <sub>2</sub> /MXene(1mg) | 78.8±0.1          | 52.9±0.9 | 29±0.3        | 44.63            | 1.79       | 1.62       | -9.36                                    | -59.02          | -68.39           |
| TiO <sub>2</sub> /MXene(2mg) | 78.0±0.1          | 53.2±0.1 | 28.9±1.5      | 44.67            | 1.65       | 1.62       | -9.38                                    | -59.39          | -68.77           |
| TiO <sub>2</sub> /MXene(3mg) | 72.5±0.1          | 57.6±0.1 | 28±2.1        | 44.22            | 0.45       | 6.25       | -9.22                                    | -52.87          | -62.09           |
| TiO <sub>2</sub> /MXene(4mg) | 68.9±0.7          | 51.1±0.9 | 29.3±1.5      | 44.51            | 1.15       | 6.56       | -9.32                                    | -49.54          | -58.86           |
| PVDF                         | 84.9±0.4          | 68.5±0.1 | 26.7±1.3      | 45.53            | 0.05       | 1.87       | -9.67                                    | -66.01          | -75.68           |

**Table S2.** Comparison of anti-fouling and antibacterial performance between the membranes in this study and those in the previous studies

| Membrane              | Feed water<br>(g/L) | Pressure<br>(Bar) | Flux<br>(LMH) | FRR<br>(%) | Antibacterial<br>(%) | Ref. |
|-----------------------|---------------------|-------------------|---------------|------------|----------------------|------|
| PVDF/TiO <sub>2</sub> | 0.5 BSA             | 1.0               | 290           | 46         | -                    | 1    |
| PSF/MXene             | 1.0 BSA             | 1.0               | 450           | 76.1       | -                    | 2    |

|                             |         |     |        |       |      |           |
|-----------------------------|---------|-----|--------|-------|------|-----------|
| PES/TiO <sub>2</sub>        | 2.0 BSA | 1.0 | 55     | 46.1  | -    | 3         |
| PES-TiO <sub>2</sub> /MXene | 1.0 BSA | 1.0 | 756.8  | 80.2  | -    | 4         |
| EPVC/TiO <sub>2</sub>       | 0.5 BSA | 2.0 | 435    | 89    | -    | 5         |
| MoS <sub>2</sub> -FeOOH     | 1.0 BSA | 1.0 | 385.3  | >70   | -    | 6         |
| PVC/ZnO-CMC                 | 1.0 BSA | 1.0 | 107.36 | 90    | >90  | 7         |
| HKUST-1@LCNFs               | 1.0 BSA | 1.0 | 207.32 | 90.56 | 90   | 8         |
| N-Si-MWNTs                  | 1.0 BSA | 1.0 | 173.7  | 96.5  | 95.6 | 9         |
| TiO <sub>2</sub> /MXene@PVD | 1.0 BSA | 1.0 | 211.5  | 80%   | 95   | This work |

F

---

## References

- 1 M.H.D.A. Farahani and V. Vatanpour, *Sep. Purif. Technol.*, 2018, **197**, 372-381.
- 2 S. Zhen, C. Wei, X. Hang, Y. Wen, K. Qing, W. Ao, D. Mingmei and S. Juan, *Int. J. Env. Res. Pub. He.*, 2019, **16**.
- 3 A. Razmjou, A. Resosudarmo, R.L. Holmes, H. Li, J. Mansouri and V. Chen, *Desalination*, 2012, **287**, 271-280.
- 4 Z. Huang, Q. Zeng, Y. Liu, Y. Xu, R. Li, H. Hong, L. Shen and H. Lin, *J. Membrane Sci.*, 2021, **640**, 119854.
- 5 H. Rabiee, M.H.D.A. Farahani and V. Vatanpour, *J. Membrane Sci.*, 2014, **472**, 185-193.
- 6 M. Wang, F. Sun, H. Zeng, X. Su, G. Zhou, H. Liu and D. Xing, *Separations*, 2022, **9**.
- 7 X. Yang, X. Ma, J. Yuan, X. Feng, Y. Zhao and L. Chen, *J. Appl. Polym. Sci.*, 2023, **140**.
- 8 S. Yang, R. Tang, Y. Dai, T. Wang, Z. Zeng and L. Zhang, *Sep. Purif. Technol.*, 2021, **279**.
- 9 H. Yuan-Wei, W. Zuo-Ming, Y. Xi, C. Jun, G. Ya-Jun and L. Wan-Zhong, *J. Colloid Interf. Sci.*, 2017, **505**.
